# Supplementary material
Source: publisher figshare collection journal article supplement (https://diabetesjournals.figshare.com/articles/dataset/_/13168862)
Supplement: Supplementary file 1 [file 1]

## ONLINE APPENDIX

### Multinucleated giant cells in adipose tissue are specialized in adipocyte degradation

Julia Braune<sup>1</sup>, Andreas Lindhorst<sup>1,2</sup>, Janine Fröba<sup>1,2</sup>, Constance Hobusch<sup>2</sup>, Peter Kovacs<sup>3</sup>, Matthias Blüher<sup>3</sup>,  
Jens Eilers<sup>4</sup>, Ingo Bechmann<sup>2</sup> and Martin Gericke<sup>1</sup>

#### Supplemental Figure 1

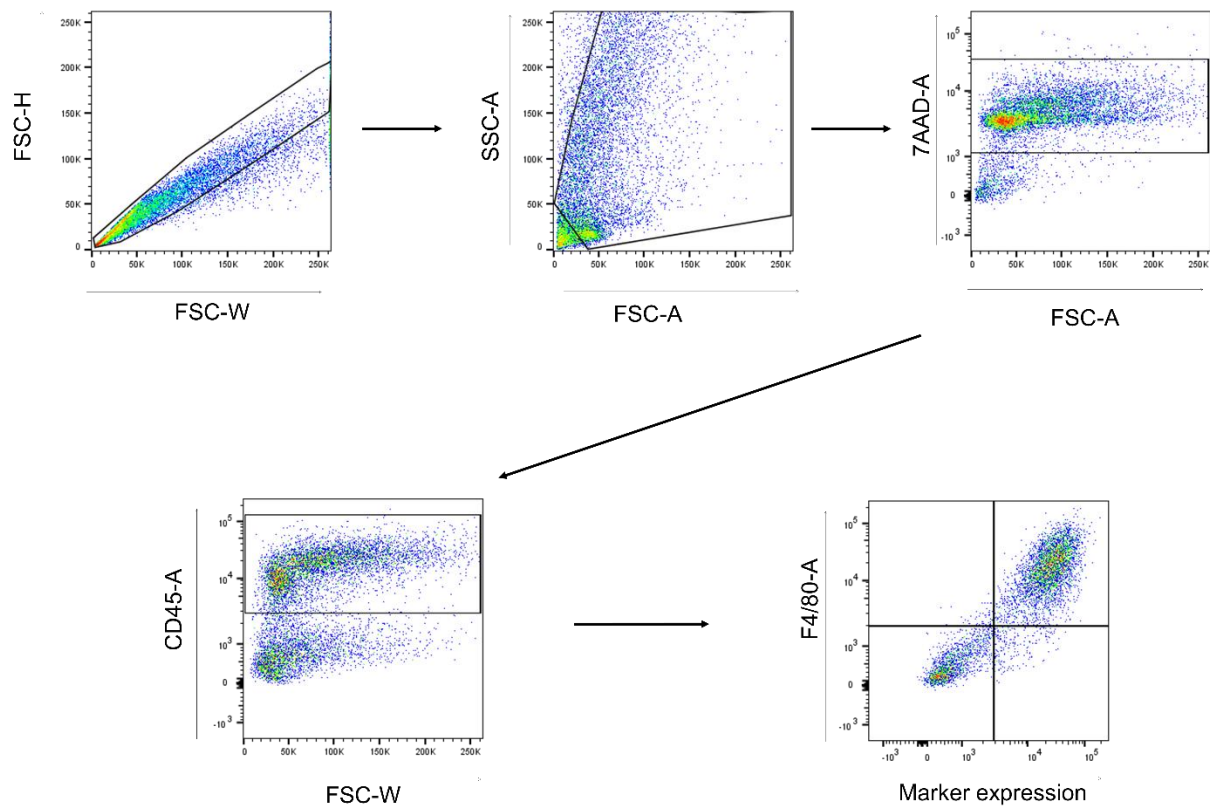

Gating strategy for flow cytometry analysis of ATMs (defined as CD45<sup>+</sup> F4/80<sup>+</sup>) in obese AT explants following 48 h of cultivation. Expression of different surface markers was measured by mean fluorescence intensity.

## Supplemental Figure 2

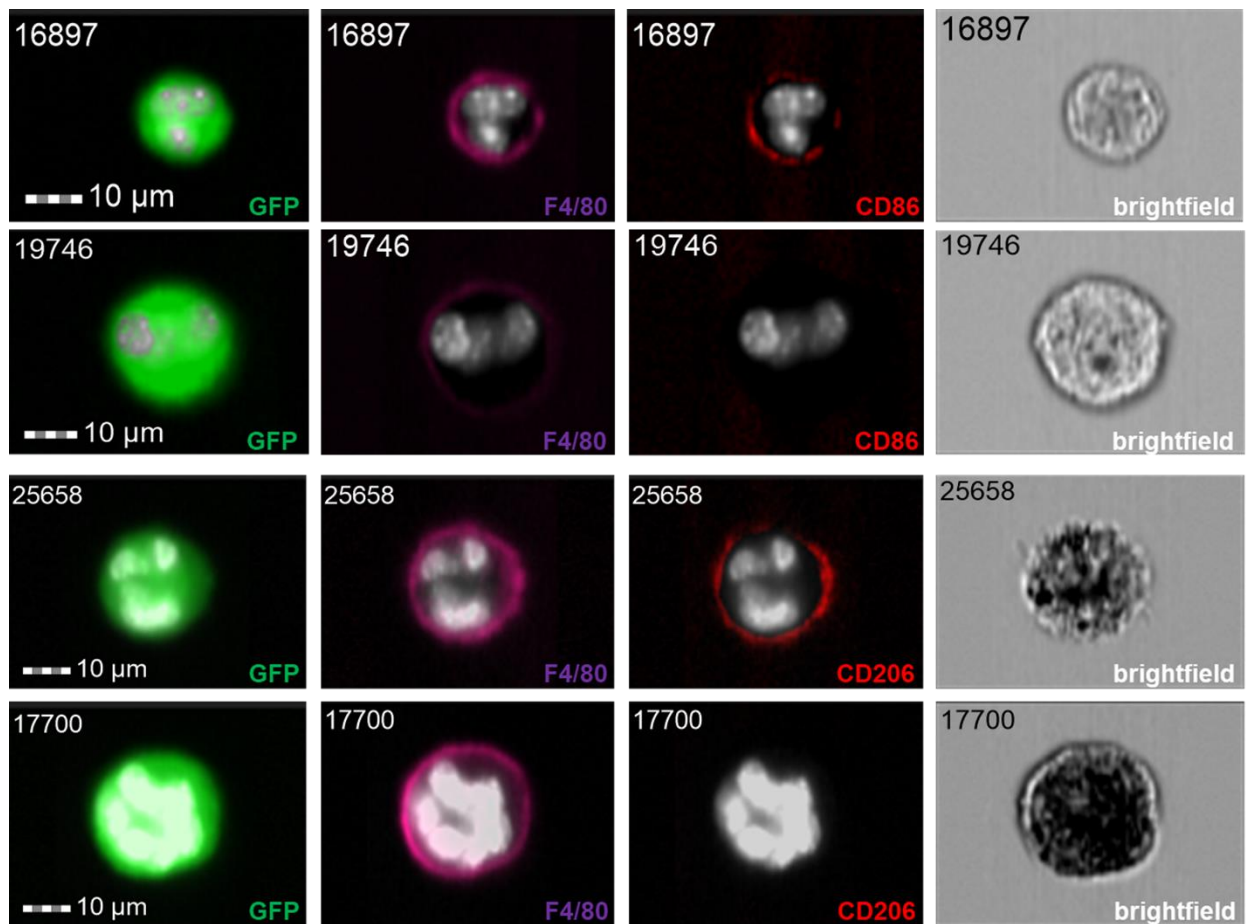

Representative images of flow cytometric imaging of CD206 and CD80 (red). MGCs were defined as GFP<sup>+</sup> (green), F4/80<sup>+</sup> (magenta) and polyploid (nuclei > 3, Hoechst grey) cells. Scale bar represents 10 μm.

### Supplemental Figure 3

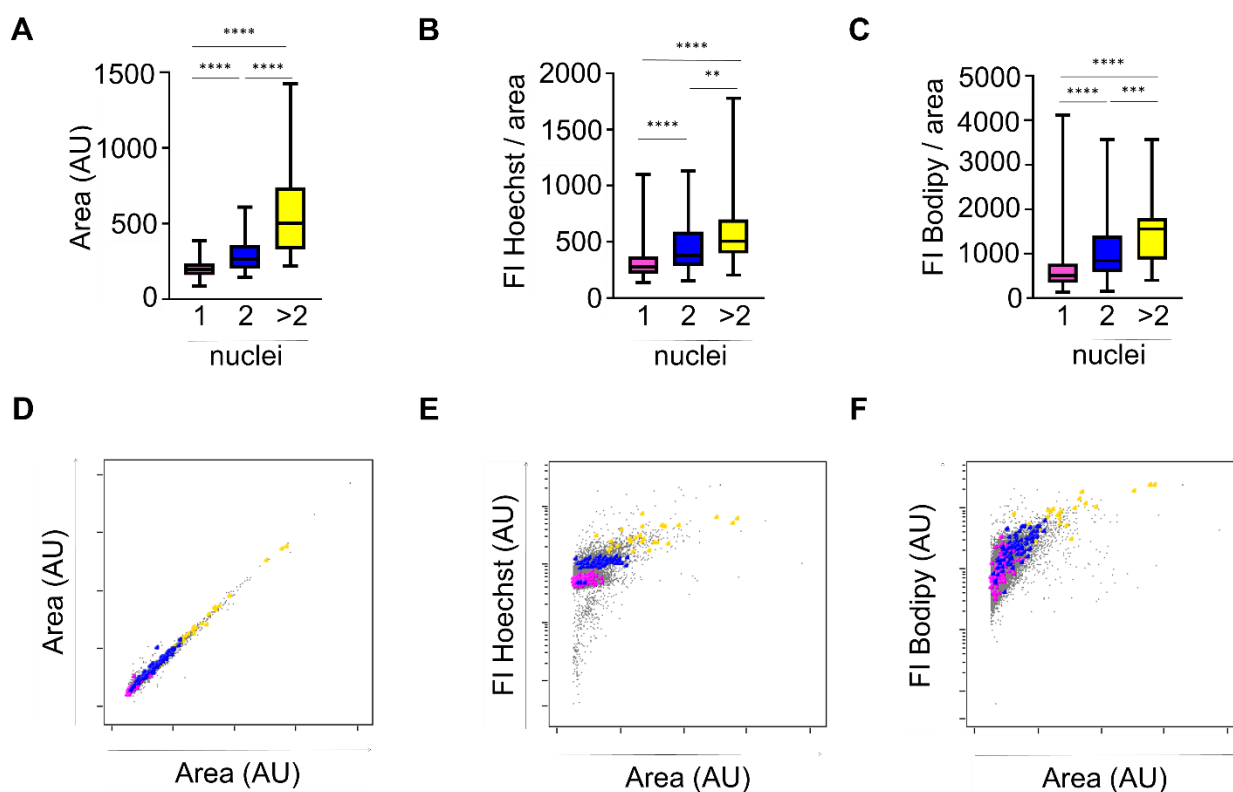

(A-C) Bar graphs represent the area (A), the relative Hoechst intensity related to the cell area (B) or the relative Bodipy intensity related to the cell area (C). (D-F) Representative flow plots of imaging cytometry. Grey dots represent all measured ATMs (defined as live GFP<sup>+</sup>/F4/80<sup>+</sup> cells). ATMs were further sub-divided by imaging cytometry into mono-nucleated (purple), bi-nucleated (blue) and multi-nucleated ATMs. \*\*p < 0.01, \*\*\*p < 0.001 and \*\*\*\*p < 0.0001.

**Supplemental Figure 4**

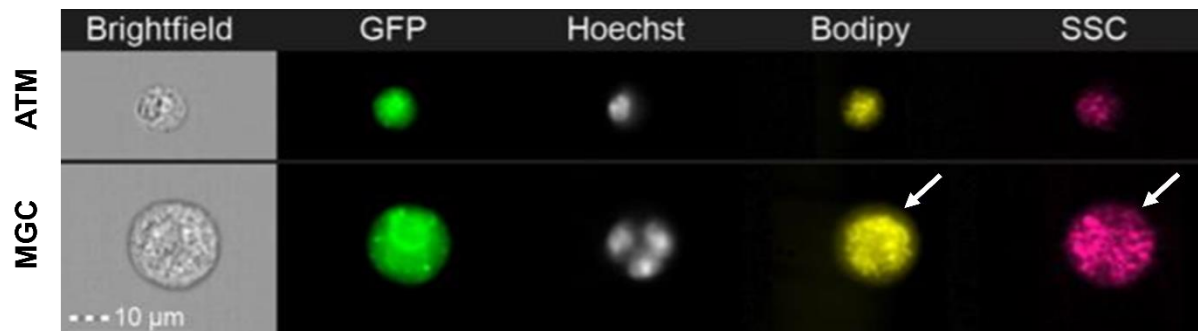

Representative images of flow cytometric imaging of cell lipid content visualized by the neutral lipid stain Bodipy (yellow) and granularity, measured by SSC (purple) in mono-nucleated ATMs and MGCs. MGCs were defined as GFP<sup>+</sup> (green), F4/80<sup>+</sup> (magenta) and polyploid (nuclei > 3, Hoechst grey) cells. Arrows indicate missing co-localization in MGCs. Scale bar represents 10  $\mu\text{m}$ .

## Supplemental Figure 5

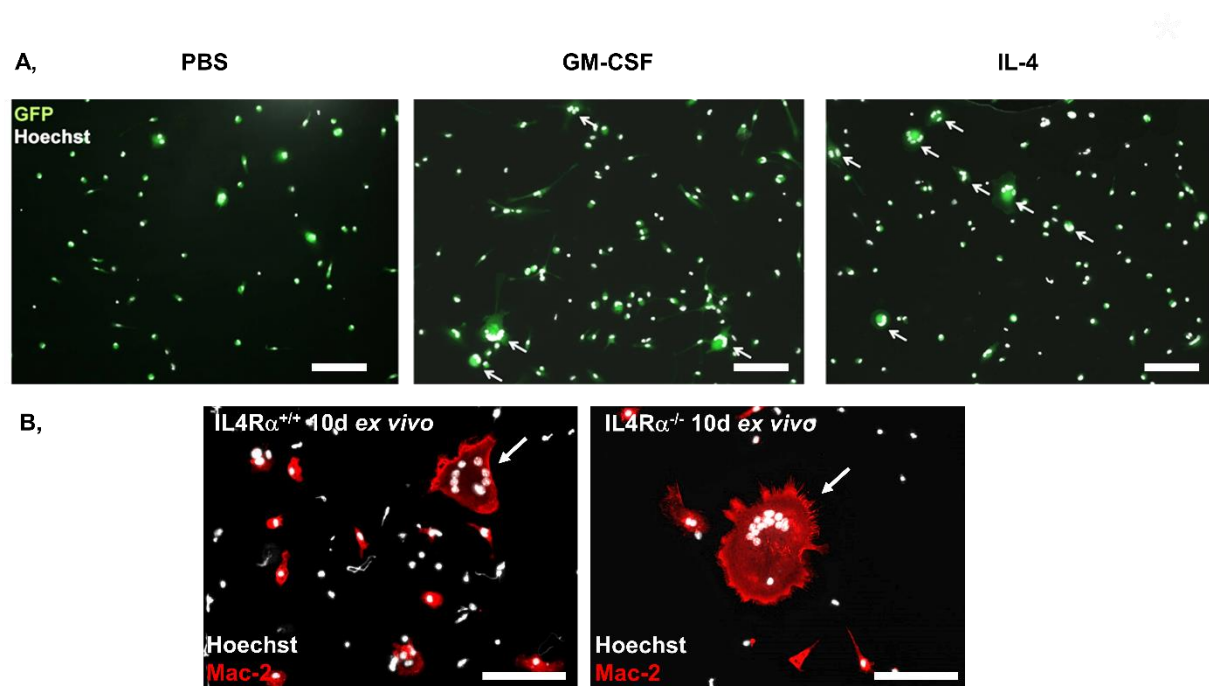

IL-4 increases MGC numbers, but is dispensable for MGC formation *ex vivo*. (A) Representative images of SVF cell quantification following isolation of MacGreen mice after explant cultivation for 48 h and cytokine stimulation (50 ng/ml). (B) Representative images of SVF cell quantification following isolation of  $\text{IL4Ra}^{+/+}$  and  $\text{IL4Ra}^{-/-}$  mice after explant cultivation for 10 d *ex vivo* to induce MGC formation. Arrows indicate MGCs, defined as polyploidy ( $n > 3$  nuclei) macrophages. Scale bar represents 100  $\mu\text{m}$ .
